# Supplementary material
Source: publisher site journal article supplement (https://www.spandidos-publications.com/5184/downloadSupplementary)

Figure S1.  $^1\text{H}$  NMR spectrum of compound K1823.

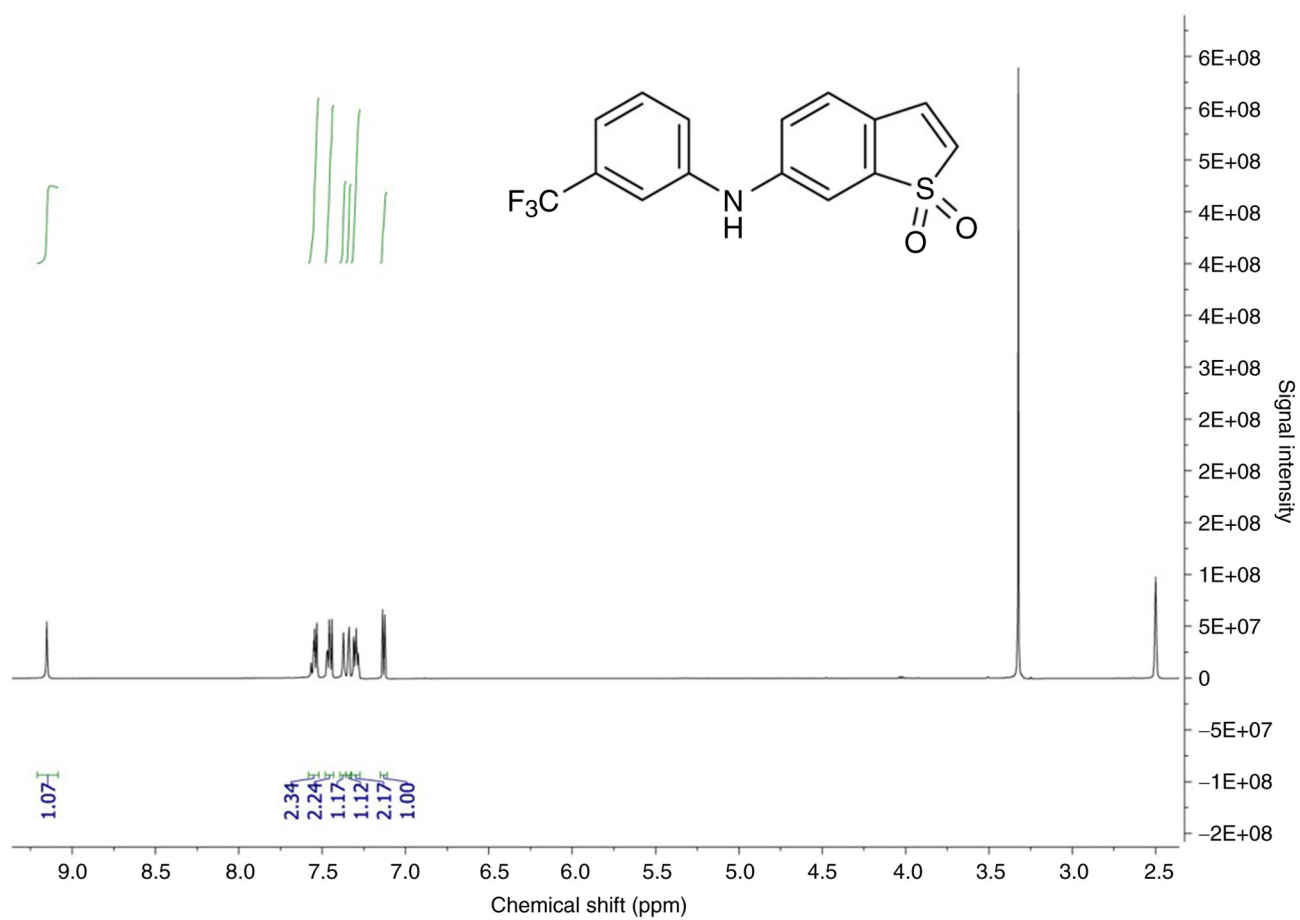

Figure S2.  $^{13}\text{C}$  NMR spectrum of compound K1823.

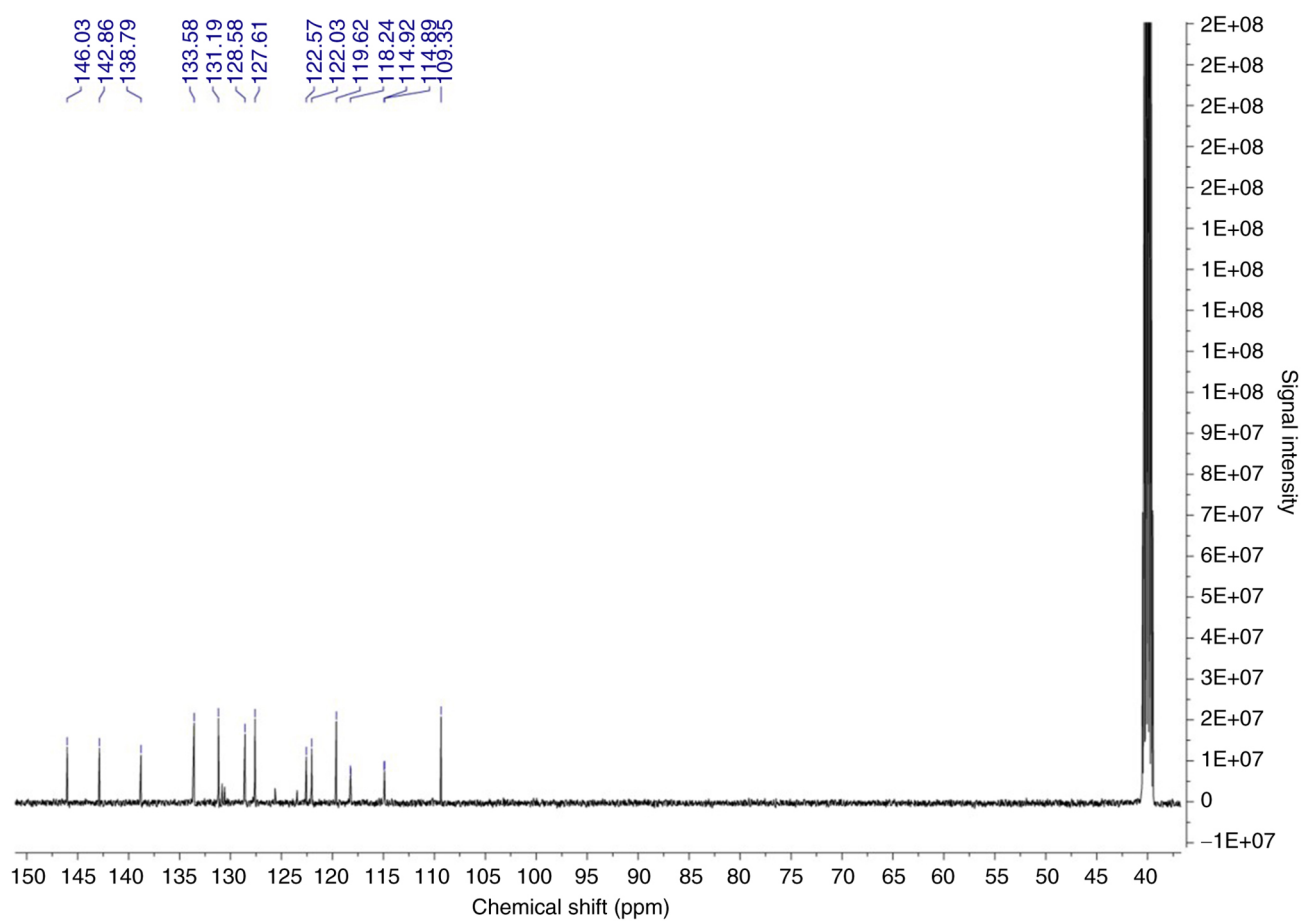

Figure S3.  $^1\text{H}$  NMR spectrum of compound K1836.

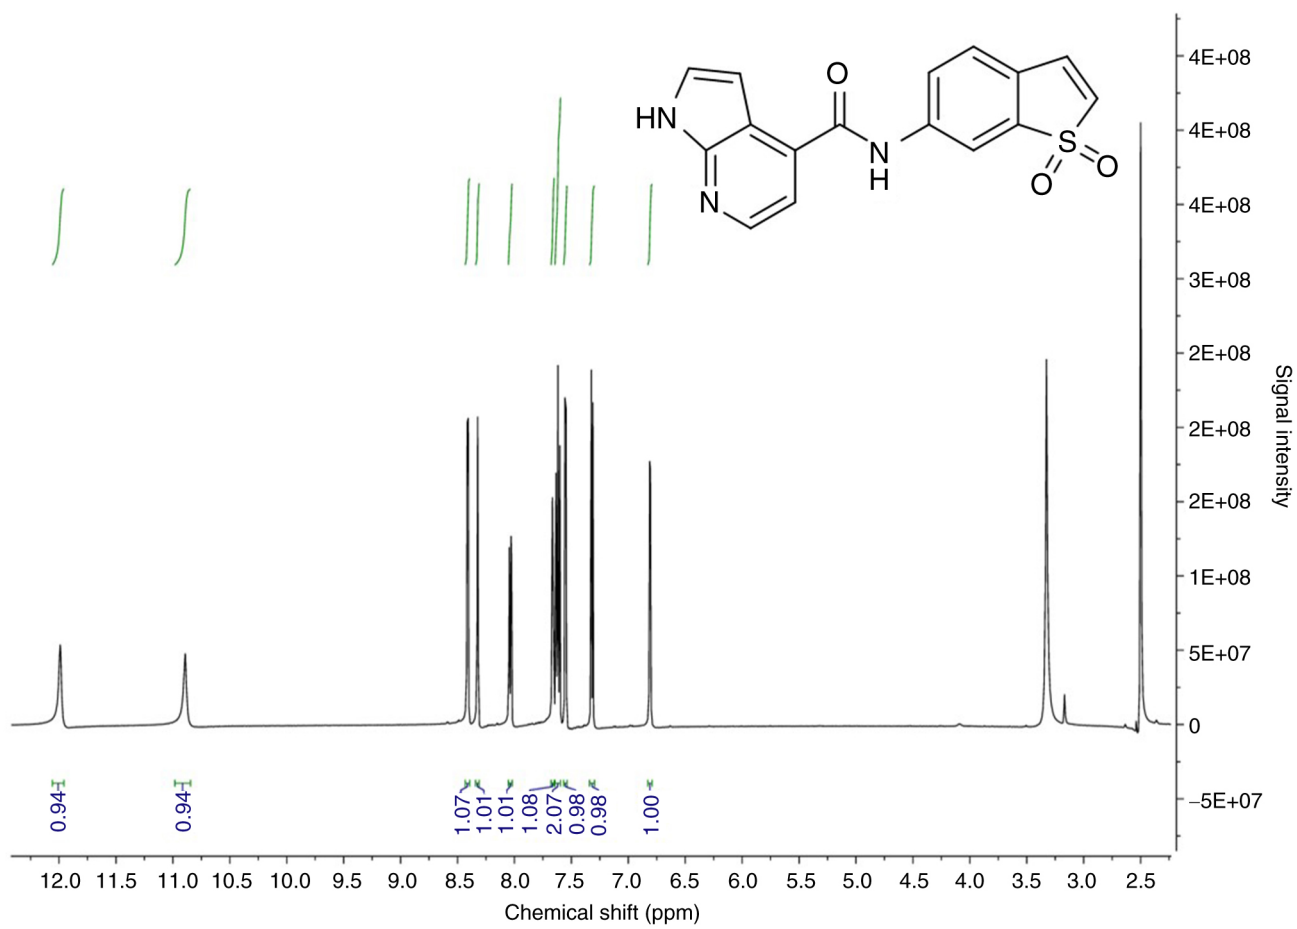

Figure S4.  $^{13}\text{C}$  NMR spectrum of compound K1836.

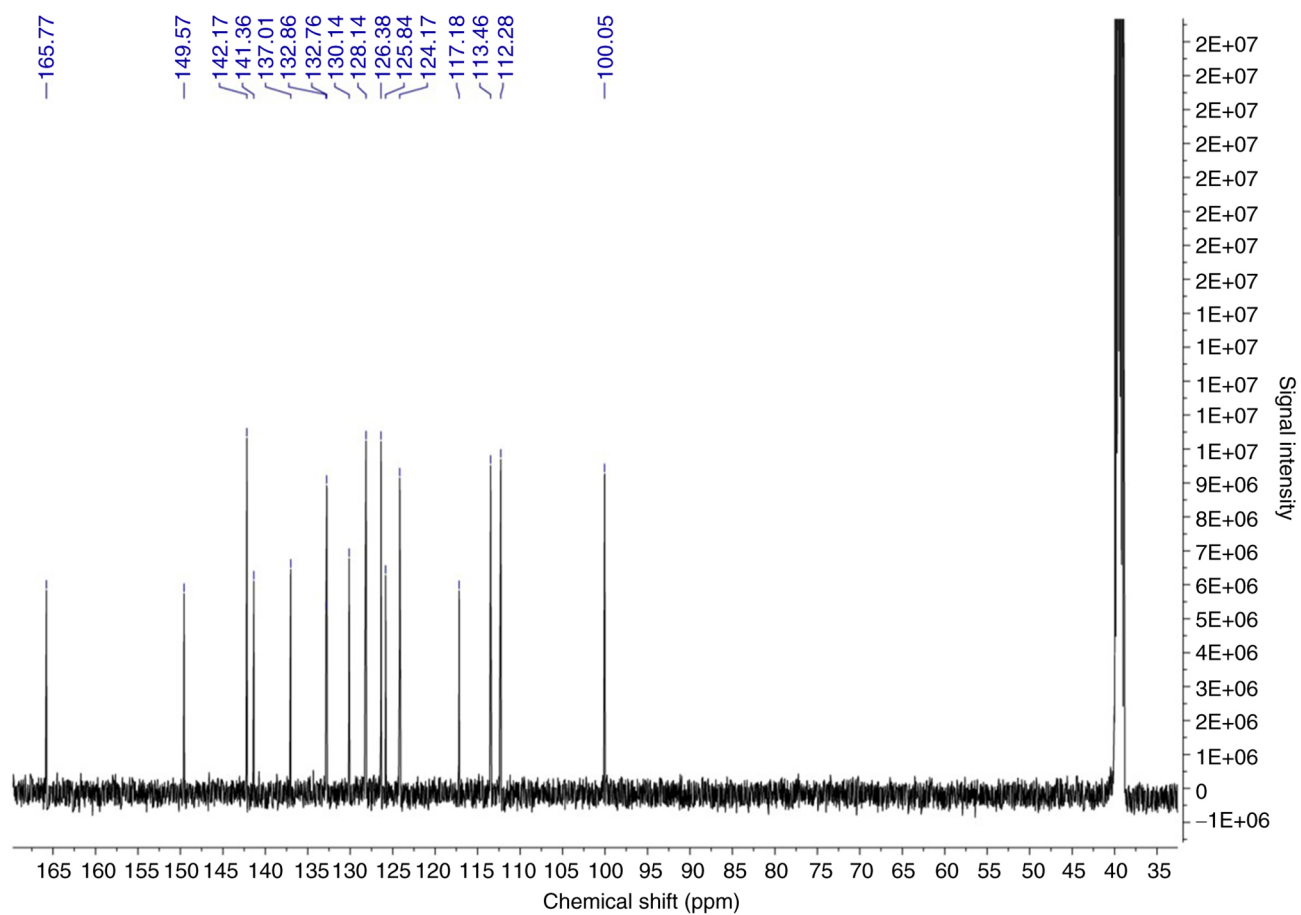

Figure S5. Cytotoxic effects of Stattic and novel STAT3 inhibitors on proliferating murine TC-1 and TRAMP-C2 cells. Representative dot plots for proliferating TC-1 and TRAMP-C2 cells.

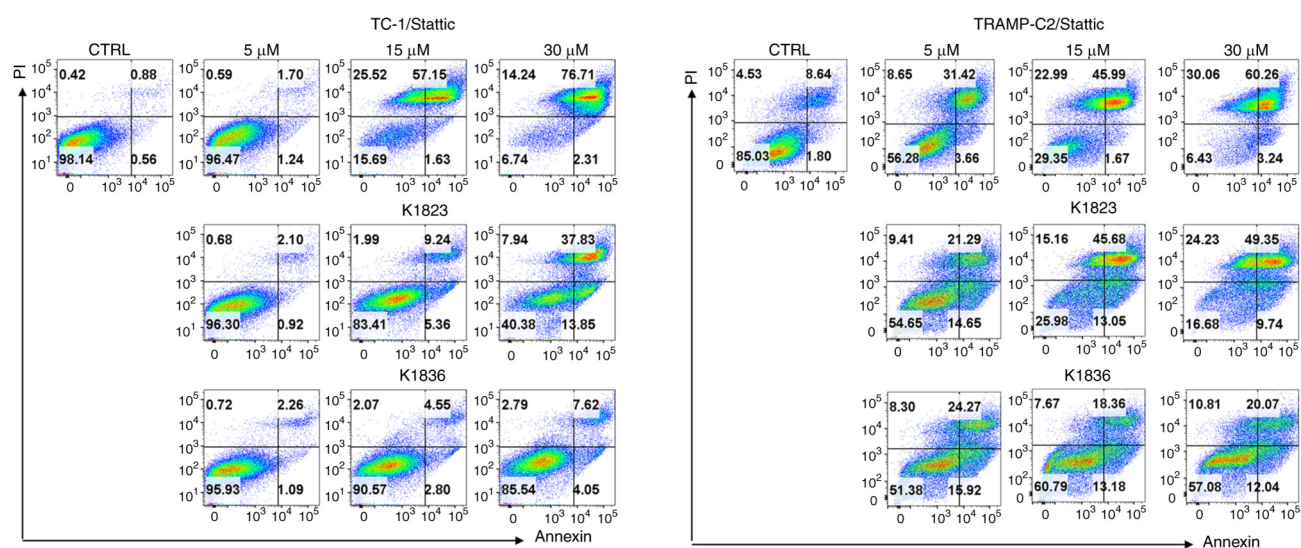

Figure S6. Secretion of IL-6 and MCP-1 by senescent TC-1 and TRAMP-C2 tumour cells after the treatment with 15  $\mu$ M K1836. Protein expression levels of IL-6 and MCP-1 were assessed using the CBA assay. Representative dot plots for TC-1 and TRAMP-C2 cells.

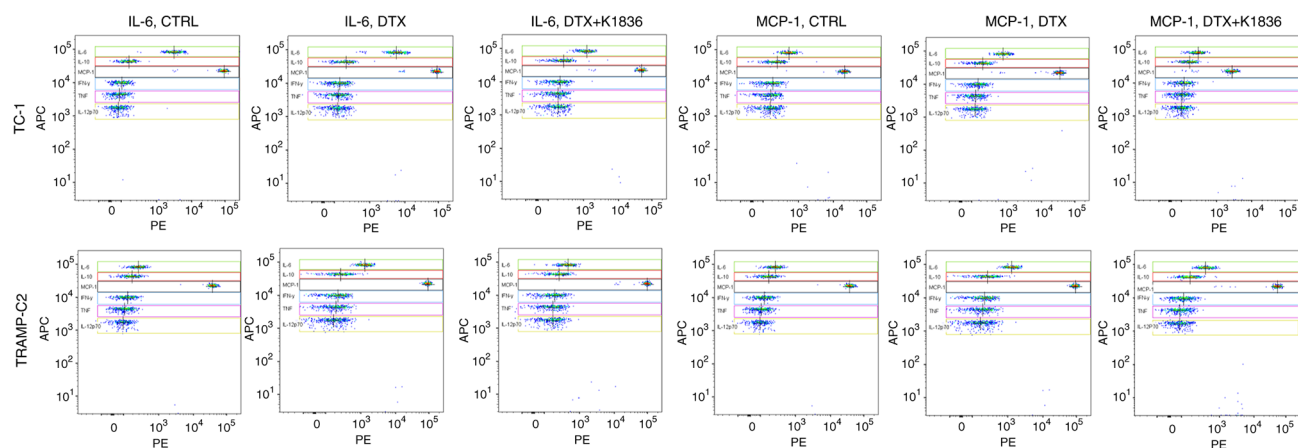

Supplement: Supplementary file [file downloadSupplementary]
